# Correction: Nevirapine and Efavirenz Elicit Different Changes in Lipid Profiles in Antiretroviral-Therapy-Naive Patients Infected with HIV-1

Published October 19, 2004

DOI: 10.1371/journal.pmed.0010073

Copyright: © 2004 Public Library of Science. This is an open-access article distributed under the terms of the Creative Commons Attribution License, which permits unrestricted use, distribution, and reproduction in any medium, provided the original work is properly cited.

Citation: (2004) Correction: Nevirapine and efavirenz elicit different changes in lipid profiles in antiretroviral-therapy-naive patients infected with HIV-1. PLoS Med 1(1): e19.

In *PLoS Medicine*, volume 1, issue 1:

## Nevirapine and Efavirenz Elicit Different Changes in Lipid Profiles in Antiretroviral-Therapy-Naive Patients Infected with HIV-1

Frank van Leth, Prahpan Phanuphak, Erik Stroes, Brian Gazzard, Pedro Cahn, et al.

DOI: 10.1371/journal.pmed.0010019

The following information was missing from the legend for Figure 1: closed squares, NVP; open squares, EFV; error bars denote standard errors. Oliver Flint at Bristol-Myers Squibb alerted PLoS Medicine to this omission.

There was also a line with open circles in Figure 1F that should not have been included.

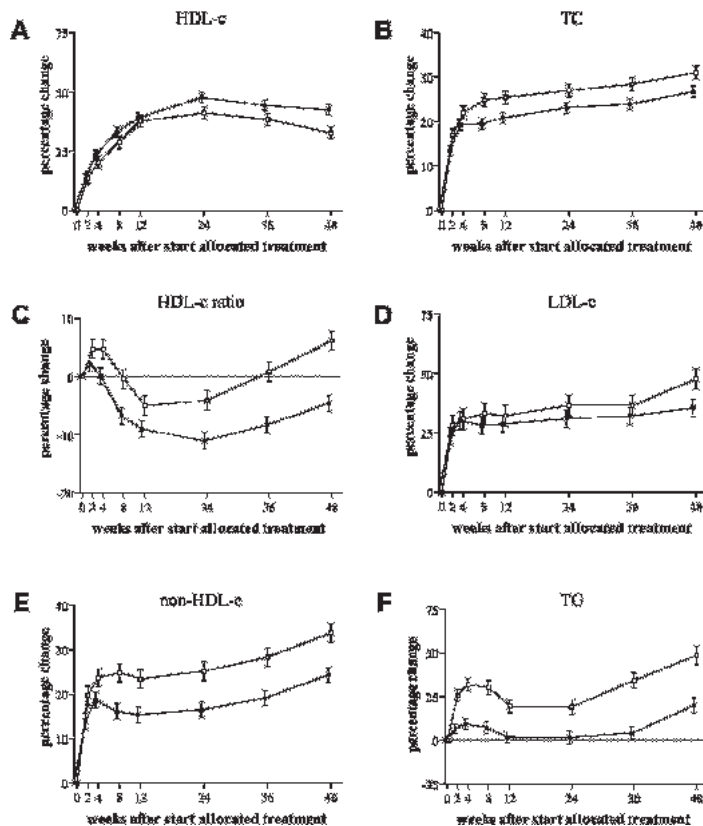

DOI: 10.1371/journal.pmed.0010073.g001

**Figure 1.** Change in Plasma Concentrations of Lipids and Lipoproteins Adjusted for sex, region, pVL decrease, and CD4<sup>+</sup>-cell increase. Closed squares, NVP; open squares, EFV; error bars denote standard errors.

This correction note may be found online at DOI: 10.1371/journal.pbio.0010073.
